# Supplementary material for: Neuronal regulated ire-1-dependent mRNA decay controls germline differentiation in Caenorhabditis elegans
Source: eLife. 2021 Sep 3;10:e65644. doi: 10.7554/eLife.65644 (PMC8416019; doi:10.7554/eLife.65644)
Supplement: Supplementary file 1. [file elife-65644-supp1.xlsx]

## Sheet: גיליון1
			List of sensory neurons included under the che-12 promoter
	Neuropeptides	Neurotransmitter	Neuron Name
	flp-4, flp-6, flp-13, flp-20, flp-25, ins-1, ins-22, ins-26, ins-32, nlp-3, nlp-5, nlp-14	Glutamate	ASE
	nlp-1	Glutamate	AWC
	flp-21, ins-1, nlp-3, nlp-15	Glutamate	ASH
	flp-21, nlp-8, nlp-10, nlp-14	Glutamate	ASK
	flp-6, flp-13, flp-22 , ins-1	Glutamate	ASG
	flp-4, flp-21, nlp-7, nlp-8, nlp-10	Glutamate	ADL
	-	Glutamate	AQR
	-	Glutamate	PQR
	nlp-7, nlp-14	Glutamate	PHA
	nlp-1	Glutamate	PHB
	-	-	AWA
	nlp-3, nlp-9	Acetylcholine	AWB
	daf-28, flp-2, flp-10, flp-21, ins-1, ins-3, ins-4, ins-6, ins-7, ins-9, ins-22, ins-26, ins-32, nlp-1, nlp-5, nlp-6, nlp-7, nlp-9, nlp-14, nlp-18, nlp-24, nlp-27, pdf-1	-	ASI
	flp-6, ins-1, nlp-3	Acetylcholine, Serotonin	ADF
	nlp-3	-	ASJ
	flp-8, flp-10, flp-11, flp-19	Acetylcholine	URX
