# Supplementary material for: Neuronal regulated ire-1-dependent mRNA decay controls germline differentiation in Caenorhabditis elegans
Source: eLife. 2021 Sep 3;10:e65644. doi: 10.7554/eLife.65644 (PMC8416019; doi:10.7554/eLife.65644)
Supplement: Supplementary file 2. [file elife-65644-supp2.xlsx]

## Sheet: DATA SHEET
Fig.1A : One-way ANOVA followed by Tukey's post hoc analysis
			degrees of freedom	p-value	F
			3(20)	<0.0001	29740.9
comparison	p-value	difference
tfg-1(RNAi) vs. control(RNAi)	P<0.001	22.2963
rrf-1(-); tfg-1(RNAi) vs. rrf-1(-); control(RNAi)	P<0.001	1.1757
Fig.1B : One-way ANOVA followed by Tukey's post hoc analysis
			degrees of freedom	p-value	F
			6(21)	<0.0001	65652.2
comparison	p-value	difference
tfg-1(RNAi) vs. control(RNAi)	P<0.001	19.001
Pire-1::ire-1 vs. (-)	P<0.001	19.4796
Prgef-1::ire-1 vs. (-)	P<0.001	23.9432
Pmyo-3::ire-1 vs. (-)	P<0.001	0.4249
Pges-1::ire-1 vs. (-)	P<0.001	0.4624
Fig.1C : One-way ANOVA followed by Tukey's post hoc analysis
			degrees of freedom	p-value	F
			3(12)	<0.0001	35987.9
comparison	p-value	difference
Pire-1::ire-1 vs. Pges-1::ire-1	P<0.001	22.1319
Pire-1::ire-1 vs. Pmyo-3::ire-1	P<0.001	22.4523
Pire-1::ire-1 vs. Prgef-1::ire-1	P<0.001	1.0807
Fig.1D: Nested one-way ANOVA followed by Tukey's post hoc analysis
			degrees of freedom	F
comparison	p-value	difference
Punc-119::gfp; ced-3(-) vs. Prgef-1::ire-1; Punc-119::gfp; ced-3(-)	0.0011	31.0901	1,1.9998	871.38
Fig.2A : two-way ANOVA followed by Tukey's post hoc analysis
			degrees of freedom	p-value	F
			6(42)	<0.0001	3052.52
comparison	p-value	difference
Pche-12::ire-1; ire-1(-):g.c.t vs. Pche-12::ire-1; ire-1(-):g.c.c	P<0.001	24.8178
Pdaf-28::ire-1; ire-1(-):g.c.t vs. Pdaf-28::ire-1; ire-1(-):g.c.c	0.9986	0.2463
Pdaf-7::ire-1; ire-1(-):g.c.t vs. Pdaf-7::ire-1; ire-1(-):g.c.c	1	0.0944
Pdat-1::ire-1; ire-1(-):g.c.t vs. Pdat-1::ire-1; ire-1(-):g.c.c	1	0.1778
Peat-4::ire-1; ire-1(-):g.c.t vs. Peat-4::ire-1; ire-1(-):g.c.c	P<0.001	24.0679
Prgef-1::ire-1; ire-1(-):g.c.t vs. Prgef-1::ire-1; ire-1(-):g.c.c	P<0.001	25.7532
Punc-52::ire-1; ire-1(-):g.c.t vs. Punc-52::ire-1; ire-1(-):g.c.c	0.9983	0.2516
Fig.2B : two-way ANOVA followed by Tukey's post hoc analysis
			degrees of freedom	p-value	F
			1(8)	0.0061	13.6368
comparison	p-value	difference
eat-4(ad572):g.c.t vs. eat-4(ad572):g.c.c	P<0.001	25.1305
eat-4(ky5):g.c.t vs. eat-4(ky5):g.c.c	P<0.001	26.5342
Fig.2C : two-way ANOVA followed by Tukey's post hoc analysis
			degrees of freedom	p-value	F
			19(120)	<0.0001	2731.03
comparison	p-value	difference
wt:g.c.c-wt:g.c.t	P<0.001	41.3852
wt:g.c.c vs. flp-4(-):g.c.c	P<0.001	1.0723
wt:g.c.c vs. flp-6(-):g.c.c	P<0.001	43.1677
wt:g.c.c vs. flp-13(-):g.c.c	P<0.001	2.9964
wt:g.c.cvs. flp-20(-):g.c.c	0.7275	0.4275
wt:g.c.c vs. flp-21(-):g.c.c	P<0.001	3.3928
wt:g.c.c vs. flp-22(-):g.c.c	P<0.001	0.9706
wt:g.c.c vs. flp-25(-):g.c.c	0.8395	0.4006
wt:g.c.c vs. nlp-1(-):g.c.c	P<0.001	1.569
wt:g.c.c vs. nlp-3(-):g.c.c	P<0.001	1.9358
wt:g.c.c vs. nlp-5(-):g.c.c	P<0.001	1.8992
wt:g.c.c vs. nlp-7(-):g.c.c	P<0.001	1.0701
wt:g.c.c vs. nlp-8(-):g.c.c	P<0.001	2.9725
wt:g.c.c vs. nlp-10(-):g.c.c	P<0.001	2.9235
wt:g.c.c vs. nlp-14(-):g.c.c	P<0.001	2.957
wt:g.c.c vs. nlp-15(-):g.c.c	P<0.001	3.1653
wt:g.c.c vs. ins-1(-):g.c.c	P<0.001	1.1331
wt:g.c.c vs. ins-22(-):g.c.c	1	0.0382
wt:g.c.c vs. ins-26(-):g.c.c	P<0.001	3.4378
wt:g.c.c vs. ins-32(-):g.c.c	P<0.001	1.8764
wt:g.c.t vs. flp-4(-):g.c.t	P<0.001	1.8847
wt:g.c.t vs. flp-6(-):g.c.t	P<0.001	3.5812
wt:g.c.t vs. flp-13(-):g.c.t	P<0.001	2.4021
wt:g.c.t vs. flp-20(-):g.c.t	P<0.001	3.3803
wt:g.c.t vs. flp-21(-):g.c.t	P<0.001	2.4342
wt:g.c.t vs. flp-22(-):g.c.t	P<0.001	2.9644
wt:g.c.t vs. flp-25(-):g.c.t	P<0.001	2.4219
wt:g.c.t vs. nlp-1(-):g.c.t	P<0.001	2.9715
wt:g.c.t vs. nlp-3(-):g.c.t	P<0.001	3.4255
wt:g.c.t vs. nlp-5(-):g.c.t	P<0.001	1.4221
wt:g.c.t vs. nlp-7(-):g.c.t	P<0.001	5.4199
wt:g.c.t vs. nlp-8(-):g.c.t	P<0.001	4.3791
wt:g.c.t vs. nlp-10(-):g.c.t	P<0.001	2.4409
wt:g.c.t vs. nlp-14(-):g.c.t	P<0.001	2.4292
wt:g.c.t vs. nlp-15(-):g.c.t	P<0.001	4.3582
wt:g.c.t vs. ins-1(-):g.c.t	P<0.001	4.4275
wt:g.c.t vs. ins-22(-):g.c.t	P<0.001	5.3754
wt:g.c.t vs. ins-26(-):g.c.t	P<0.001	4.4472
wt:g.c.t vs. ins-32(-):g.c.t	P<0.001	1.4919
Fig.2D : Student's T-test
comparison	p-value	difference
control(RNAi) vs. flp-6(RNAi)	P<0.001	39.0326
Fig.2E : One-way ANOVA followed by Tukey's post hoc analysis
			degrees of freedom	p-value	F
			7(24)	<0.0001	11055.9
comparison	p-value	difference
wt vs. flp-6(-)	P<0.001	40.0835
wt vs. che-1(p672)	P<0.001	35.9091
wt vs. che-1(p674)	P<0.001	36.8292
wt vs. lin-11(n389)	1	0.0242
wt vs. lin-11(n566)	0.0463	0.8995
Pche-1::flp-6; flp-6(-) vs. flp-6(-)	P<0.001	40.0764
Psrh-142::flp-6; flp-6(-) vs. flp-6(-)	P<0.001	2.7991
Fig.2F: Nested one-way ANOVA followed by Tukey's post hoc analysis			degrees of freedom	F
comparison	p-value	difference
Punc-119::gfp; ced-3(-); gld-1(RNAi); control(RNAi) vs. Punc-119::gfp; ced-3(-); gld-1(RNAi); flp-6(RNAi)	P<0.001	31.0901	1152	4103.5
Pmyo-3::gfp; ced-3(-); gld-1(RNAi); control(RNAi) vs. Pmyo-3::gfp; ced-3(-); gld-1(RNAi); flp-6(RNAi)	P<0.001	2.922	1,98	689.48
Fig.3A : One-way ANOVA followed by Tukey's post hoc analysis
			degrees of freedom	p-value	F
			3(12)	<0.0001	29409.8
comparison	p-value	difference
wt vs. ire-1(-)	0.0203	0.6115
wt vs. flp-6(-)	P<0.001	37.1224
ire-1(-); flp-6(-) vs. ire-1(-)	P<0.001	36.5806
ire-1(-); flp-6(-) vs. flp-6(-)	P<0.001	1.1533
Fig.3B : One-way ANOVA followed by Tukey's post hoc analysis	F	degrees of freedom	p-value
	16.74	3,8	0.000828
comparison	p-value	difference
wt vs. ire-1(-)	0.9995	0.026
wt vs. xbp-1(-)	0.0021	0.431
wt vs. ire-1(-); xbp-1(-)	0.9926	0.063
xbp-1(-) vs. ire-1(-); xbp-1(-)	0.0016	0.472
Fig.3C: Student's T-test	t	degrees of freedom
	2.4971	2.1954
comparison	p-value	difference
wt vs. Pche-1::ire-1	0.04	0.34
Fig.3D: Nested one-way ANOVA followed by Tukey's post hoc analysis			degrees of freedom	p-value	F
			3,3.9224	<0.001	128.08
comparison	p-value	difference
Pche-1::flp-6::gfp + DMSO vs. Pche-1::flp-6::gfp + TM	P<0.001	2.89
Pche-1::flp-6::gfp; ire-1(-) + DMSO vs. Pche-1::flp-6::gfp; ire-1(-) + TM	0.5999	0.1541
Fig.3F: Nested one-way ANOVA followed by Tukey's post hoc analysis		degrees of freedom	p-value	F
		5,2.54	<0.001	258.6
comparison	p-value
wt; control RNAi vs. wt; tfg-1 RNAi	P<0.001	0.402
flp-6(ok3056); control RNAi vs. flp-6(ok3056); tfg-1 RNAi	P=0.981	0.001
flp-6(biu100); control RNAi vs. flp-6(biu100); tfg-1 RNAi	P=0.956	0.03
Fig.3H: two-way ANOVA followed by Tukey's post hoc analysis
			degrees of freedom	p-value	F
			3(32)	<0.0001	17452.9
comparison	p-value	difference
wt:g.c.t- vs. wt:g.c.c	P<0.001	32.0115
ire-1(ok799):g.c.t vs. ire-1(ok799):g.c.c	0.0033	0.5236
ire-1(wy782):g.c.t vs. ire-1(wy782):g.c.c	0.0612	0.3835
ire-1(wy762):g.c.t vs. ire-1(wy762):g.c.c	0.3963	0.2639
Fig.3I : two-way ANOVA followed by Tukey's post hoc analysis
			degrees of freedom	p-value	F
			3(16)	<0.0001	14118.1
comparison	p-value	difference
wt:g.c.t vs. wt:g.c.c	P<0.001	26.4023
ire-1(-):g.c.t vs. ire-1(-):g.c.c	0.6641	0.2418
Pops-1::ire-1; ire-1(-):g.c.t vs. Pops-1::ire-1; ire-1(-):g.c.c	0.0515	0.479
Pche-1::ire-1; ire-1(-):g.c.t vs. Pche-1::ire-1; ire-1(-):g.c.c	P<0.001	29.866
Fig.3 - supplement 1A: Student's T-test
comparison	p-value	difference
Phsp-4::gfp vs. Phsp-4::gfp; flp-6(-)	0.4948	0.0982
Fig.3 - supplement 1B: Student's T-test
comparison	p-value	difference
control RNAi vs. flp-6 RNAi	0.0056	60.0884
Fig.3 - supplement 2A: One-way ANOVA followed by Tukey's post hoc analysis
			degrees of freedom	p-value	F
comparison	p-value	difference	3,18.225	<0.0001	38.68
wt; control RNAi vs. wt; tfg-1 RNAi	<0.001	2.555
ire-1(-); control RNAi vs. ire-1(-); tfg-1 RNAi	0.9975	0.0603
Fig.3 - supplement 2B: One-way ANOVA followed by Tukey's post hoc analysis
			degrees of freedom	p-value	F
			3(12)	0.0306	4.1761
comparison	p-value	difference
tfg-1(RNAi) vs. control(RNAi)	0.7487	0.017
ire-1(-); tfg-1 RNAi vs. ire-1(-); control RNAi	0.6933	0.0187
Fig.3 - supplement 2C: One-way ANOVA followed by Tukey's post hoc analysis
			degrees of freedom	p-value	F
			3(12)	<0.0001	3354.38
comparison	p-value	difference
tfg-1(RNAi) vs. control(RNAi)	P<0.001	2.7253
ire-1(-); tfg-1 RNAi vs. ire-1(-); control RNAi	P<0.001	0.8648
Fig.3 - supplement 2D: Student's T-test
comparison	p-value	difference
control RNAi vs. tfg-1 RNAi	0.1258	0.0958
Fig.3 - supplement 2E : Nested one-way ANOVA followed by Tukey's post hoc analysis	degrees of freedom	p-value	F
	3,5.1084	0.7629	0.3943
Pche-1::mcherry + DMSO vs. Pche-1::mcherry + TM
Pche-1::mcherry; ire-1(-) + DMSO vs. Pche-1::mcherry; ire-1(-) + TM
Fig.3 - supplement 3C: One-way ANOVA followed by Tukey's post hoc analysis			p-value
			<0.0001
comparison	p-value	difference
wt; control RNAi vs. wt; tfg-1 RNAi	<0.001	35.33
flp-6(biu100); control RNAi vs. wt; control RNAi	0.51	0.19
flp-6(biu100);control RNAi vs. flp-6(biu100); tfg-1 RNAi	0.957	0.07
flp-6(biu100); tfg-1 RNAi vs. wt; tfg-1 RNAi	<0.001	34.96
Fig.4A : two-way ANOVA followed by Tukey's post hoc analysis
			degrees of freedom	p-value	F
			3(16)	<0.0001	28123
comparison	p-value	difference
AIB:Histamine + vs. AIB:Histamine -	P<0.001	0.7211
RIA:Histamine + vs. RIA:Histamine -	P<0.001	0.9867
AIA:Histamine + vs. AIA:Histamine -	0.1669	0.2987
AIY:Histamine + vs. AIY:Histamine -	P<0.001	35.4838
Fig.4B : One-way ANOVA followed by Tukey's post hoc analysis
			degrees of freedom	p-value	F
			3(12)	<0.0001	3090.96
comparison	p-value	difference
control RNAi vs. AIY(-)	P<0.001	33.2808
flp-6(RNAi) vs. AIY(-)	0.3167	0.7924
flp-6(RNAi); AIY(-) vs. AIY(-)	P<0.001	2.5845
flp-6(RNAi) vs. control RNAi	P<0.001	34.0732
flp-6(RNAi); AIY(-) vs. control RNAi	P<0.001	35.8652
flp-6(RNAi); AIY(-) vs. flp-6(RNAi)	0.0071	1.792
Fig.4C : One-way ANOVA followed by Tukey's post hoc analysis
			degrees of freedom	p-value	F
			3(8)	<0.0001	6139.72
comparison	p-value	difference
flp-6(-) vs. control(RNAi)	P<0.001	36.4714
flp-6(-); mex-3(RNAi) vs. control(RNAi)	P<0.001	59.8202
mex-3(RNAi) vs. control(RNAi)	P<0.001	25.3529
flp-6(-); mex-3(RNAi) vs. flp-6(-)	P<0.001	23.3488
mex-3(RNAi) vs. flp-6(-)	P<0.001	11.1184
mex-3(RNAi) vs. flp-6(-); mex-3(RNAi)	P<0.001	34.4672
Fig.4D : One-way ANOVA followed by Tukey's post hoc analysis
			degrees of freedom	p-value	F
			9(20)	<0.0001	13393.7
comparison	p-value	difference
wt vs. flp-6(-)	P<0.001	34.9672
wt vs. flp-1(yn4)	0.0019	1.0291
wt vs. flp-1(yn2)	0.3509	0.4985
wt vs. flp-18(db99)	0.0091	0.8851
wt vs. flp-18(gk3063)	1	0.0496
wt vs. cha-1(-)	P<0.001	34.0733
wt vs. Pttx-3::cha-1; cha-1(-)	0.3801	0.4869
wt vs. unc-17(-)	P<0.001	32.7788
wt vs. Pttx-3::unc-17; unc-17(-)	0.0043	0.9554
Pttx-3::cha-1; cha-1(-) vs. cha-1(-)	P<0.001	34.5602
Pttx-3::unc-17; unc-17(-) vs. unc-17(-)	P<0.001	33.7343
Fig.5A : One-way ANOVA followed by Tukey's post hoc analysis
			degrees of freedom	p-value	F
			8(18)	<0.0001	12311
comparison	p-value	difference
wt vs. flp-6(ok3056)	P<0.001	46.3713
wt vs. her-1(n695)	P<0.001	44.624
wt vs. sem-4(ga82)	P<0.001	40.6063
wt vs. mig-1(n1354)	P<0.001	43.1631
wt vs. mig-19(k142)	P<0.001	42.1511
wt vs. mig-20(k148)	P<0.001	42.1116
wt vs. flp-6(-); sem-4(-)	P<0.001	36.302
wt vs. flp-6(-); her-1(-)	P<0.001	34.1178
flp-6(ok3056) vs. flp-6(-); sem-4(-)	P<0.001	10.0693
sem-4(ga82) vs. flp-6(-); sem-4(-)	P<0.001	4.3043
flp-6(ok3056) vs. flp-6(-); her-1(-)	P<0.001	12.2536
her-1(n695) vs. flp-6(-); her-1(-)	P<0.001	10.5063
Fig.5B : One-way ANOVA followed by Tukey's post hoc analysis
			degrees of freedom	p-value	F
			5(12)	<0.0001	297598
comparison	p-value	difference
wt vs. flp-6(-)	P<0.001	36.8307
wt vs. nlp-3(-)	P<0.001	1.0325
wt vs. nlp-8(-)	P<0.001	1.0054
wt vs. nlp-15(-)	P<0.001	2.0277
wt vs. flp-5(-)	P<0.001	2.9748
Fig.5C: One-way ANOVA followed by Tukey's post hoc analysis
			degrees of freedom	p-value	F
			3(8)	<0.0001	2519.37
comparison	p-value	difference
wt vs. flp-6(-)	P<0.001	36.0799
wt vs. tph-1(-)	P<0.001	35.2805
wt vs. bas-1(-)	P<0.001	34.4234
Fig.5D: Nested ANOVA followed by Tukey's post hoc analysis			degrees of freedom	p-value	F
comparison	p-value	difference	7, 8.0028	<0.0001	67.668
gld-1(RNAi); control(RNAi) + no 5-HT vs. gld-1(RNAi); control(RNAi) + 5-HT	0.6531	1.808
gld-1(RNAi); flp-6(RNAi) + no 5-HT vs. gld-1(RNAi); flp-6(RNAi) + 5-HT	P<0.001	34.5531
gld-1(RNAi); mex-3(RNAi) + no 5-HT vs. gld-1(RNAi); mex-3(RNAi) + 5-HT	0.9857	0.0494
gld-1(RNAi); tfg-1(RNAi) + no 5-HT vs. gld-1(RNAi); tfg-1(RNAi) + 5-HT	P<0.001	37.7439
Fig.5E: One-way ANOVA followed by Tukey's post hoc analysis
			degrees of freedom	p-value	F
			5(18)	<0.0001	14430.8
comparison	p-value	difference
wt-tph-1(-); genomic tph-1(+)	P<0.001	1.0173
tph-1(-); genomic tph-1(+)-tph-1(-) in ADF	0.9999	0.043
tph-1(-); genomic tph-1(+)-tph-1(-) in ASG	0.0722	0.5227
tph-1(-); genomic tph-1(+)-tph-1(-) in HSN	P<0.001	28.1446
wt-tph-1(-)	P<0.001	29.6247
tph-1(-); genomic tph-1(+)-tph-1(-)	P<0.001	28.6074
tph-1(-) in ADF-tph-1(-)	P<0.001	28.5644
tph-1(-) in ASG-tph-1(-)	P<0.001	29.1301
tph-1(-) in HSN-tph-1(-)	0.1361	0.4628
Fig.5 - supplement 1 : One-way ANOVA followed by Tukey's post hoc analysis
			degrees of freedom	p-value	F
			5(18)	<0.0001	7392.03
comparison	p-value	difference
wt-flp-6(-)	P<0.001	39.3757
wt-mod-1(-)	0.9973	0.1188
wt-ser-1(-)	1	0.0226
wt-ser-4(-)	0.4896	0.4779
wt-ser-7(-)	0.6629	0.4007
Fig.5 - figure supplemet 2: One-way ANOVA followed by Tukey's post hoc analysis
			degrees of freedom	p-value	F
			5(12)	<0.0001	45566.8
comparison	p-value	difference
wt + 20mM 5-HT vs. wt	P<0.001	1.0809
tph-1(-) + 20mM 5-HT vs. tph-1(-)	P<0.001	29.5717
flp-6(-) + 20mM 5-HT vs. flp-6(-)	P<0.001	34.0381
Fig.6A : One-way ANOVA followed by Tukey's post hoc analysis
			degrees of freedom	p-value	F
			5(12)	<0.0001	291.016
comparison	p-value	difference
control vs. che-1(p679)	P<0.001	26.0732
control vs. flp-6(ok3056)	P<0.001	28.6601
control vs. cha-1(p1152)	P<0.001	31.0352
control vs. sem-4(n1378)	P<0.001	25.9739
control vs. tph-1(mg280)	P<0.001	28.0861
Fig.6C : Lifespan A375Log Rank (Mental-Cox) analysis
strain	mean lifespan	Effect on lifespan by gld-1(RNAi)	Log Rank (Mental-Cox) P- value relative to control
Wild type; control(RNAi)	11.01
wild type; gld-1(RNAi)	8.3	0.75	<0.0001
flp-6(-); control(RNAi)	13.27
flp-6(-); gld-1(RNAi)	13.426	1.01	0.89
Wild type; control(RNAi)	11.35
wild type; gld-1(RNAi)	9.97	0.88	0.004
flp-6(-); control(RNAi)	16.19
flp-6(-); gld-1(RNAi)	15.33	0.95	0.36
Wild type; control(RNAi)	11.87
wild type; gld-1(RNAi)	8.56	0.72	<0.0001
flp-6(-); control(RNAi)	14.85
flp-6(-); gld-1(RNAi)	15.01	1.01	0.857
Fig.6D : Paralysis assay A325Cochran-Mantel-Haenszel test
comparison	X2 statistic	degrees of freedom	p-value
day 5 - WT + gld-1 RNAi vs. flp-6(-) + gld-1 RNAi	20.4932	1	<0.0001
day 6 - WT + gld-1 RNAi vs. flp-6(-) + gld-1 RNAi	23.3093	1	<0.0001
day 8 - WT + gld-1 RNAi vs. flp-6(-) + gld-1 RNAi	29.3425	1	<0.0001
day 9 - WT + gld-1 RNAi vs. flp-6(-) + gld-1 RNAi	29.0843	1	<0.0001
Difference represents the absolute difference between the means of the compared groups.
Note that while many of the comparisons are statistically significant, the extent of the observed changes varies substantially.
For experiments presenting percent of gonad area occupied by large nuclei, differences beyond 20% are in bold.
g.c.t indicates treatment with gld-1; ced-3 and tfg-1 RNAi
g.c.c indicates treatment with gld-1; ced-3 and control RNAi

## Sheet: Sheet1
									Fig.3E : One-way ANOVA followed by Tueky's post hoc analysis
												degrees of freedom	p-value	F
												3(12)	0.0306	4.1761
									comparison	p-value	difference
									tfg-1(RNAi) vs. control(RNAi)	0.7487	0.017
									ire-1(-); tfg-1 RNAi vs. ire-1(-); control RNAi	0.6933	0.0187
